# Supplementary material for: Pharmacophore Directed Screening of Agonistic Natural Molecules Showing Affinity to 5HT2C Receptor
Source: PubMed Central journal article supplement (PMC6843766; doi:10.3390/biom9100556), 2019-10-01
Supplement: biomolecules-09-00556-s001.pdf [file biomolecules-09-00556-s001.pdf]

## Supplementry Figures

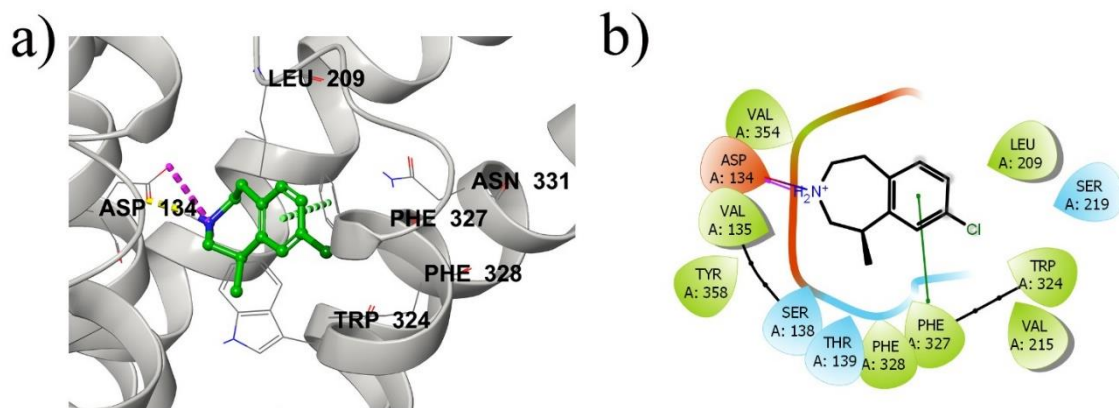

**Figure S1:** Interaction profile of known drug lorcaserin with 5HT<sub>2C</sub> receptor after docking studies depicted in both 3D (left side; Hydrogen bonds (yellow), salt bridge (magenta) and  $\pi$ - $\pi$  (green) interactions as shown in dotted lines) and 2D (right side) forms
